# Supplementary material for: Growth and DNA Methylation Alteration in Rice (Oryza sativa L.) in Response to Ozone Stress
Source: MDPI journal article supplement (doi:10.3390/genes14101888), 2023-09-28
Supplement: s1 [file s1]

**Table S1.** Sequences of adaptors and primers for MSAP analysis.

| Primer Types                      | Primer<br>Sequence (5'-3') |                                   |
|-----------------------------------|----------------------------|-----------------------------------|
|                                   | <i>EcoR</i> I              | <i>Hpa</i> II/ <i>Msp</i> I (H/M) |
| Adaptor                           | CTCGTAGACTGCGTACC          | GATCATGAGTCCTGCT                  |
|                                   | AATTGGTACGCAGTC            | CGAGCAGGACTCATGA                  |
| Primer                            | GACTGCGTACCAATTCA          | ATCATGAGTCCTGCTCGG                |
| Selective-amplification<br>Primer | E-AAC                      | H/M-TCT                           |
|                                   | GACTGCGTACCAATTCAA         | ATCATGAGTCCTGCTCGGTC              |
|                                   | C                          | T                                 |
|                                   | E-AAG                      | H/M-TCG                           |
|                                   | GACTGCGTACCAATTCAA         | ATCATGAGTCCTGCTCGGTC              |
|                                   | G                          | G                                 |
|                                   | E-ACA                      | H/M-TCC                           |
|                                   | GACTGCGTACCAATTCAC         | ATCATGAGTCCTGCTCGGTC              |
|                                   | A                          | C                                 |
|                                   | E-ACT                      | H/M-TTC                           |
|                                   | GACTGCGTACCAATTCAC         | ATCATGAGTCCTGCTCGGTT              |
|                                   | T                          | C                                 |
|                                   | E-ACC                      | H/M-TTG                           |
|                                   | GACTGCGTACCAATTCAC         | ATCATGAGTCCTGCTCGGTT              |
|                                   | C                          | G                                 |
|                                   | E-ACG                      | H/M-TTA                           |
|                                   | GACTGCGTACCAATTCAC         | ATCATGAGTCCTGCTCGGTT              |
|                                   | G                          | A                                 |
|                                   | E-AGC                      | H/M-TGA                           |
|                                   | GACTGCGTACCAATTCAG         | ATCATGAGTCCTGCTCGGTG              |
|                                   | C                          | A                                 |
|                                   | E-AGG                      | H/M-TGT                           |
|                                   | GACTGCGTACCAATTCAG         | ATCATGAGTCCTGCTCGGTG              |
|                                   | G                          | T                                 |
|                                   | E-AGA                      | H/M-TGC                           |
|                                   | GACTGCGTACCAATTCAG         | ATCATGAGTCCTGCTCGGTG              |
|                                   | A                          | C                                 |
|                                   | E-ATC                      | H/M-TAC                           |
|                                   | GACTGCGTACCAATTCAT         | ATCATGAGTCCTGCTCGGTA              |
|                                   | C                          | C                                 |
